# Supplementary material for: Urinary Liver-Type Fatty Acid Binding Protein, a Biomarker for Disease Progression, Dialysis and Overall Mortality in Chronic Kidney Disease
Source: MDPI journal article supplement (doi:10.3390/jpm13101481), 2023-10-11
Supplement: s1 [file s1]

## Supplementary Material

Table S1 : Logistic regression models for the prediction of CKD progression by uL-FABP and uPCR over the 2 years of follow-up

| Outcome: CKD progression, Predictor: uL-FABP |                   |         |                   |         |
|----------------------------------------------|-------------------|---------|-------------------|---------|
|                                              | Unadjusted        |         | + Age, Sex        |         |
|                                              | OR (95% CI)       | Sig     | OR (95% CI)       | Sig     |
| <b>uL-FABP</b>                               | 1.01 (1.00; 1.01) | 0.015*  | 1.01 (1.00; 1.01) | 0.016*  |
| Outcome: CKD progression, Predictor: uPCR    |                   |         |                   |         |
|                                              | Unadjusted        |         | +Age, Sex         |         |
|                                              | OR (95% CI)       | Sig     | OR (95% CI)       | Sig     |
| <b>uPCR</b>                                  | 1.00 (1.00; 1.01) | <0.001* | 1.00 (1.00; 1.01) | <0.001* |

Results are presented as Odds Ratios (OR) and Co-efficient with 95% Confidence Intervals (CI). \* denotes statistical significance (sig) at the level of  $p < 0.05$ . uL-FABP= urinary liver type fatty-acid binding protein, uPCR= urinary protein to creatinine ratio.

Table S2. Subgroup analysis of demographic and biochemical characteristics of participants' with no proteinuria (uPCR<50) and high uL-FABP levels (>8 mcg/gCr) that showed progression at year 1 of follow-up

| Demographics                                         |                                    | CKD progression   | No CKD progression | p-value |
|------------------------------------------------------|------------------------------------|-------------------|--------------------|---------|
| <b>N</b>                                             |                                    | 12                | 23                 |         |
| <b>CKD stage</b>                                     | 1-2                                | -                 | 4.3%               | 0.360   |
|                                                      | 3A                                 | -                 | 13.0%              |         |
|                                                      | 3B                                 | 16.7%             | 17.4%              |         |
|                                                      | 4                                  | 75.0%             | 43.5%              |         |
|                                                      | 5                                  | 8.3%              | 21.7%              |         |
| <b>Age</b>                                           |                                    | 67 (SD 16)        | 68 (SD 13)         | 0.906   |
| <b>Sex: Male</b>                                     |                                    | 41.7%             | 56.5%              | 0.404   |
| <b>Ethnicity</b>                                     | <b>White</b>                       | 75.0%             | 78.3%              | 0.218   |
|                                                      | <b>Black</b>                       | -                 | -                  |         |
|                                                      | <b>Asian</b>                       | -                 | 13.0%              |         |
|                                                      | <b>Chinese</b>                     | -                 | -                  |         |
|                                                      | <b>Other</b>                       | 25.0%             | 8.7%               |         |
| <b>Primary CKD Pathology</b>                         | <b>Unspecified</b>                 | -                 | -                  | 0.535   |
|                                                      | <b>APKD</b>                        | 33.3%             | 13.0%              |         |
|                                                      | <b>Diabetic Nephropathy</b>        | 8.3%              | 26.1%              |         |
|                                                      | <b>Glomerulonephritis</b>          | -                 | -                  |         |
|                                                      | <b>Acute/Chronic TIN</b>           | -                 | 13.0%              |         |
|                                                      | <b>Obstructive/Stones/Reflux</b>   | -                 | -                  |         |
|                                                      | <b>Renovascular/HTN/ Ischaemic</b> | 16.7%             | 13.0%              |         |
|                                                      | <b>Vasculitis/SLE</b>              | 8.3%              | 8.7%               |         |
|                                                      | <b>Myeloma</b>                     | 8.3%              | -                  |         |
|                                                      | <b>Hereditary Nephropathy</b>      | -                 | 4.3%               |         |
|                                                      | <b>Other</b>                       | 8.3%              | 8.7%               |         |
|                                                      | <b>Uncertain Aetiology</b>         | 16.7%             | 13.0%              |         |
| <b>Cardiovascular Disease</b>                        |                                    | 33.3%             | 26.1%              | 0.652   |
| <b>Diabetes Mellitus</b>                             |                                    | 25.0%             | 43.5%              | 0.283   |
| <b>Davies' Comorbidity Score</b>                     |                                    | 1.0 (0.25; 1.0)   | 1.5 (1; 2)         | 0.403   |
| <b>Baseline Serum Creatinine (umol/L)</b>            |                                    | 213 (SD 35)       | 230 (SD 97)        | 0.456   |
| <b>Baseline MDRD eGFR (ml/min/1.73m<sup>2</sup>)</b> |                                    | 23 (21; 27)       | 21 (15; 39)        | 0.889   |
| <b>uPCR mg/gCr</b>                                   |                                    | 32.1 (SD 10.9)    | 25.5 (SD 14.2)     | 0.169   |
| <b>uL-FABP ELISA (mcg/gCr)</b>                       |                                    | 17.0 (13.0; 27.2) | 15.5 (12.1; 24.5)  | 0.651   |
| <b>1 Year Serum Creatinine (umol/L)</b>              |                                    | 280 (SD 80)       | 215 (SD 100)       | 0.061   |
| <b>1 Year MDRD eGFR (ml/min/1.73m<sup>2</sup>)</b>   |                                    | 19 (SD 8)         | 29 (SD 15)         | 0.026*  |
| <b>Increase in Creatinine (%)</b>                    |                                    | 23.1 (13.6; 36.4) | -6.8 (-17.2; 1.7)  | <0.001* |
| <b>Decrease in eGFR (ml/min/1.73m<sup>2</sup>)</b>   |                                    | 6 (3; 6)          | -1 (-5; 1)         | <0.001* |

CKD progression was defined as decline in the MDRD eGFR by 5ml/min or more, increase in serum creatinine by 10% or more and renal death (initiation of renal replacement therapy). Group comparison was performed using Chi-square for categorical variables and Kruskal Wallis test for continuous variables. Post-hoc analysis for categorical variables was performed through observation of standardised residuals. \* indicates statistical significance at  $p = 0.05$ . APKD= adult polycystic kidney disease, CKD= chronic kidney disease, eGFR= estimate glomerular filtration rate, gCr= gram of creatinine, HTN= hypertensive nephropathy, L= litre, m= metre, mcg= microgram, MDRD= Modification of Diet in Renal Disease, mg= milligram, ml= millilitre, mmol= millimol, SLE= systemic lupus erythematosus, TIN= tubulointerstitial nephritis, uL-FABP= urinary liver type fatty-acid binding protein, uPCR= urinary protein to creatinine ratio
